# Supplementary material
Source: Springer Nature journal article supplement (https://www.springermedizin.de/resource/supplementary/12885_2009_1525_MOESM1_ESM.pdf/9472236)

panc02-Neo

panc02-MUC1-C

panc02-MUC1-F

MUC1

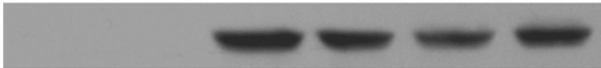

Tubulin

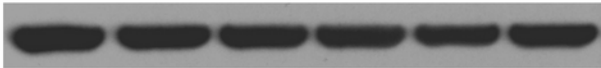

Supplement: MOESM1 [file 9472236]
